# Supplementary material for: A qualitative study among primary healthcare providers’ perception of the quality of the free maternal healthcare policy in Ghana
Source: Research Square preprint supplement (doi:10.21203/rs.3.rs-5043310/v1), 2025-04-24
Supplement: Supplementary file 1 [file 4be8912b7343542bd9f44ec1.docx]

**INTERVIEW GUIDE**

**A QUALITATIVE STUDY AMONG PRIMARY HEALTHCARE PROVIDERS’ PERCEPTION OF THE QUALITY OF THE FREE MATERNAL HEALTHCARE POLICY IN GHANA**

As part of ways to explore the healthcare provider’s perception of the Free Maternal Healthcare Policy in Ghana, a group of investigators from the Kwame Nkrumah University of Science and Technology (KNUST), Kumasi-Ghana, is conducting research onprimary healthcare providers’ perception of the quality of the Free Maternal Healthcare Policy in Ghana. Participation in this project is voluntary and any information taken from you will be treated with the utmost confidentiality and will be used solely for the purpose for which it is obtained.

Thank you.

**SECTION A: Background Information**

- 1. Name and sex of responding officer
  2. The rank of responding officer (qualification)
  3. Number of years of working in this facility
  4. Years of experience in the facility
  5. Name of facility

**SECTION B: Can you describe the structure in place in this facility for the implementation of the free maternal health care policy?**

1. What are the costs for patients under this policy?
2. How is the staffing organized for the implementation of this policy?
3. What services are covered under the free maternal health care policy?
4. How are the services covered by this policy paid for? (Free, co-payments, out-of-pocket)
5. What facilities and equipment are available for maternal health care in this facility?

**SECTION C: Can you walk us through the processes involved with the implementation of this policy in your facility?**

1. What are the current policies on pregnancy in this facility?
2. What risks are associated with pregnancy as per your facility’s guidelines?
3. How is safe motherhood care defined and practised during delivery in this facility?
4. What does adherence to postnatal care involve in your facility?
5. How is risk communication for maternal healthcare handled in your facility?

**SECTION D: Can you discuss the outcomes of implementing this policy in your facility?**

1. What successes have been achieved with the implementation of this policy? (e.g., Reduction in mortality, Reduction in case morbidity, Increase in attendance [ANC, Deliveries, PNC], Client satisfaction level)
2. What challenges have been encountered with the implementation of this policy? (e.g., Delay in reimbursement of claims, Delays in reviewing NHIS tariff to suit economic conditions, Co-payment issues, Human resource challenges, Financial challenges, Logistics and infrastructure challenges)
